# Supplementary material
Source: PubMed Central journal article supplement (PMC3831505)
Supplement: NIHMS524093-supplement-Supplemental_Information.pdf [file NIHMS524093-supplement-Supplemental_Information.pdf]

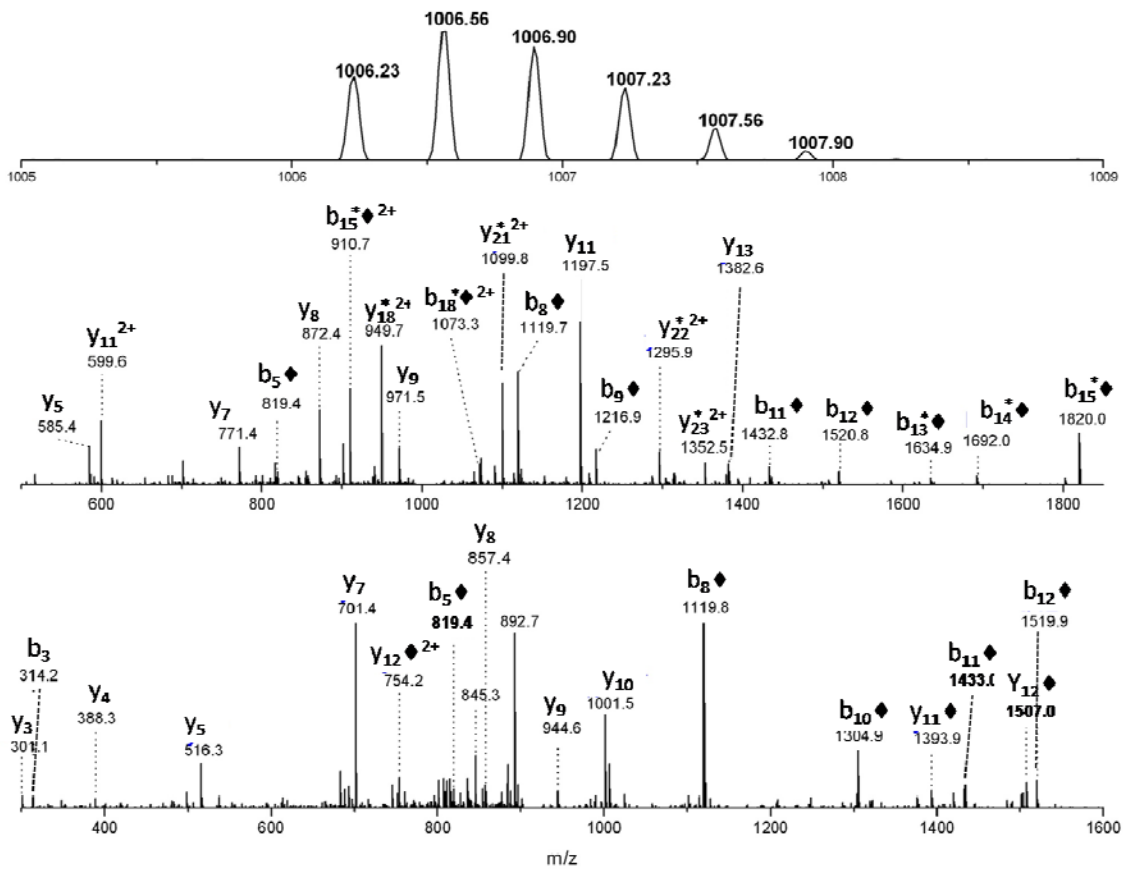

Supplemental Figure 1. Zoomed mass spectrum of bovine C18:1 modified bovine AQP0 234-259  $[M+3H]^{3+}$  ion (top panel). Tandem (MS/MS) mass spectrum of m/z 1006.6 indicating sequence specific ions where the black diamond (♦) indicates ions modified by oleic acid and asterisks indicate ions modified by deamidation (middle panel). MS<sup>3</sup> mass spectrum from of the b<sub>15</sub><sup>2+</sup> ion (m/z 910.8) originating from the C18:1 modified AQP0 234-259  $[M+3H]^{3+}$  ion, m/z 1006.6.
